# Supplementary material for: Performance of the Line-By-Line Radiative Transfer Model (LBLRTM) for temperature, water vapor, and trace gas retrievals: recent updates evaluated with IASI case studies
Source: Copernicus journal article supplement (doi:10.5194/acp-13-6687-2013), 2013-07-15
Supplement: Supplementary file 1 [file acp-13-6687-2013-supplement.pdf]

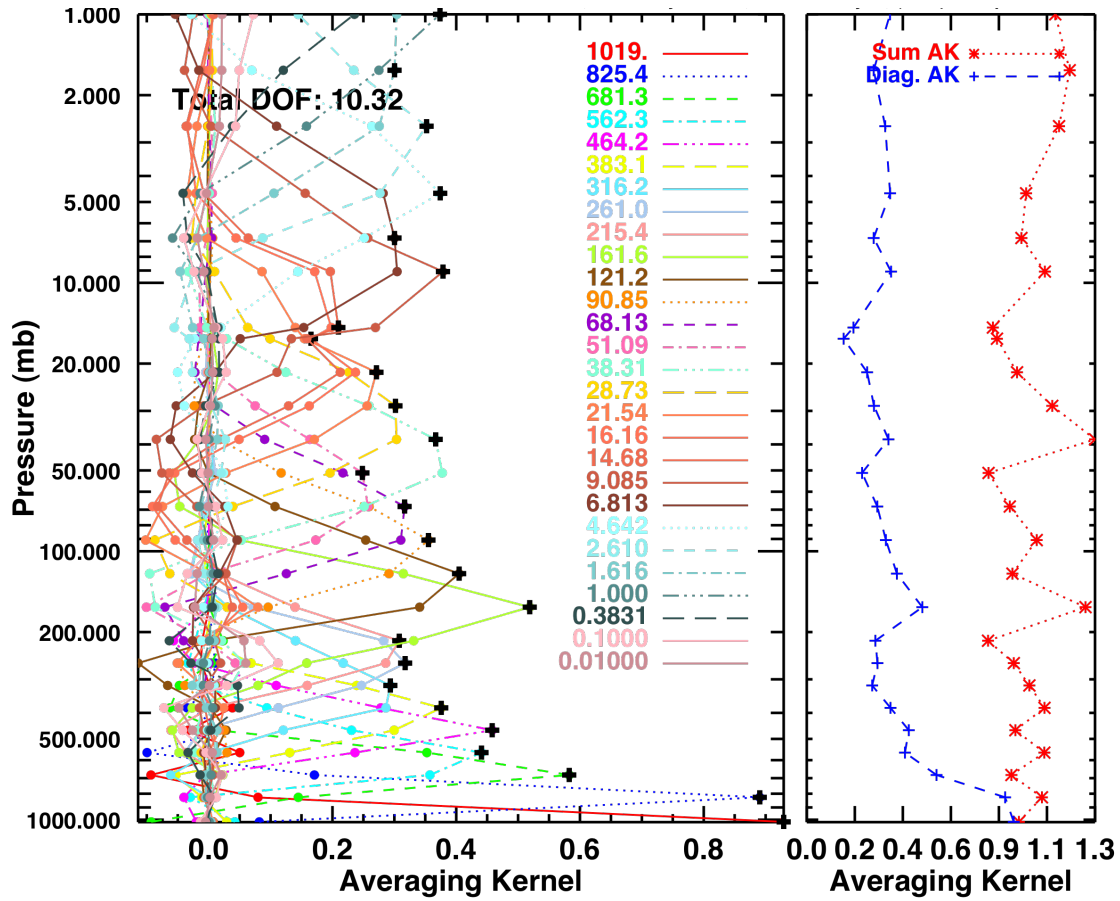

1  
2  
3  
4  
5  
6

Supplementary Figure 1(a). Averaging kernel for the CO<sub>2</sub> v<sub>2</sub> band temperature retrievals using LBLRTM v12.1 for an example profile with 1.5 cm PWV. The averaging kernel for LBLRTM v9.4+ (not shown) is similar.

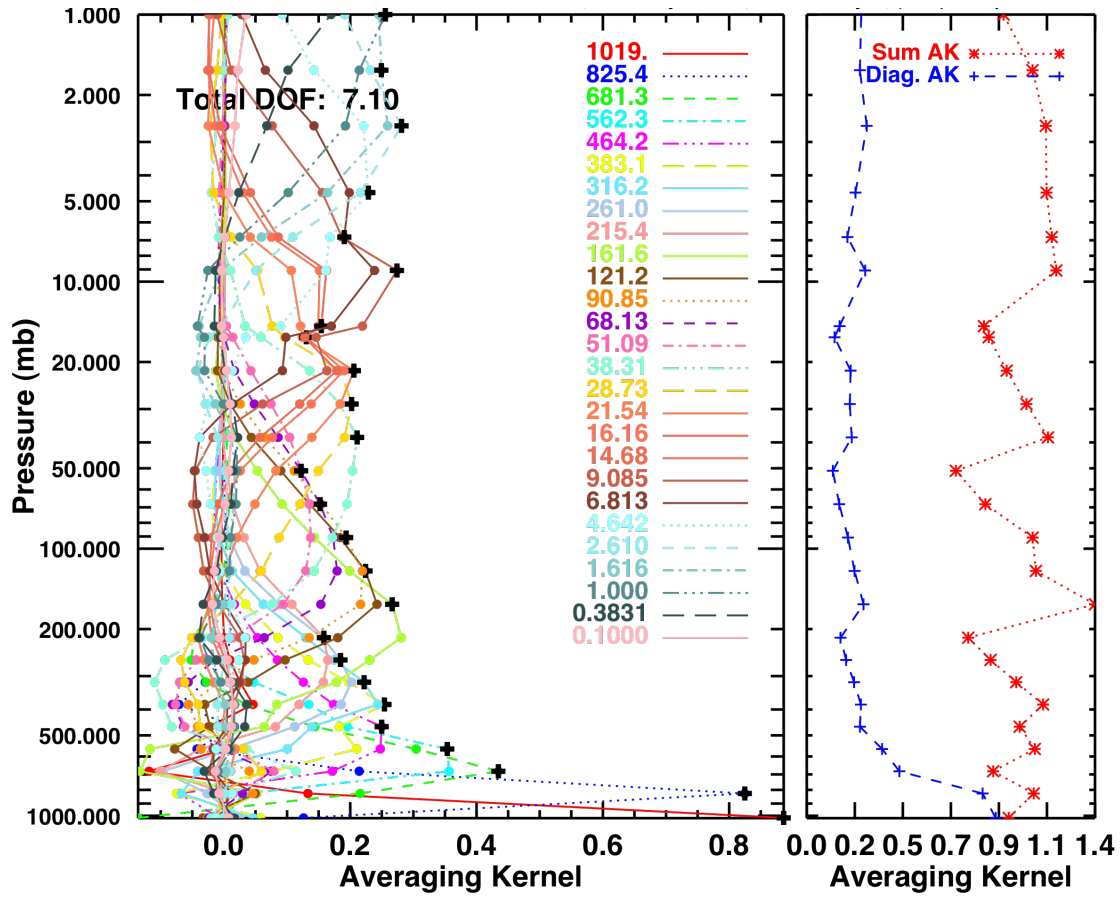

1

2

3 Supplementary Figure 1(b). Averaging kernel for the CO<sub>2</sub> v<sub>3</sub> band temperature retrievals  
 4 using LBLRTM v12.1 for an example profile with 1.5 cm PWV. The averaging kernel  
 5 for LBLRTM v9.4+ (not shown) is similar.

6

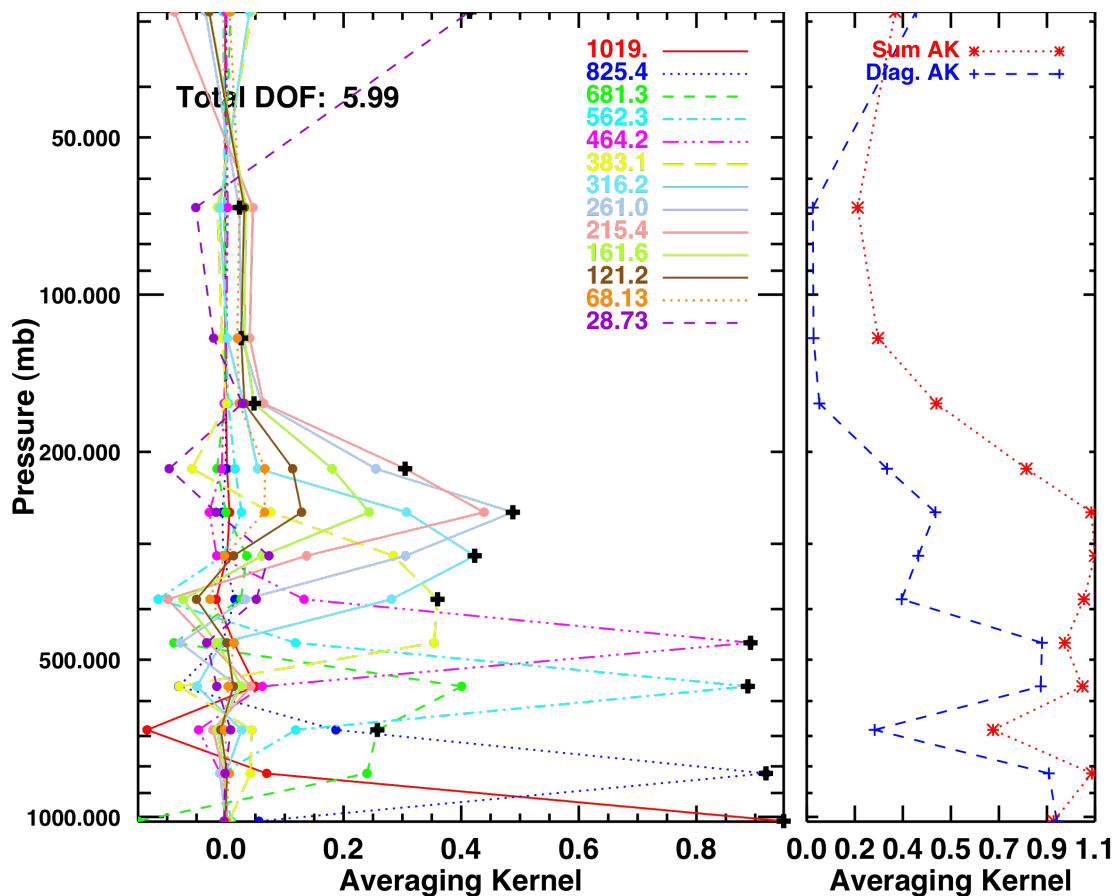

1

2

3 Supplementary Figure 2(a). Averaging kernel for the P- and R-branch water vapor  
 4 retrievals using LBLRTM v12.1 for an example profile with 1.5 cm PWV. The LBLRTM  
 5 v9.4+ averaging kernel (not shown) is similar.

6

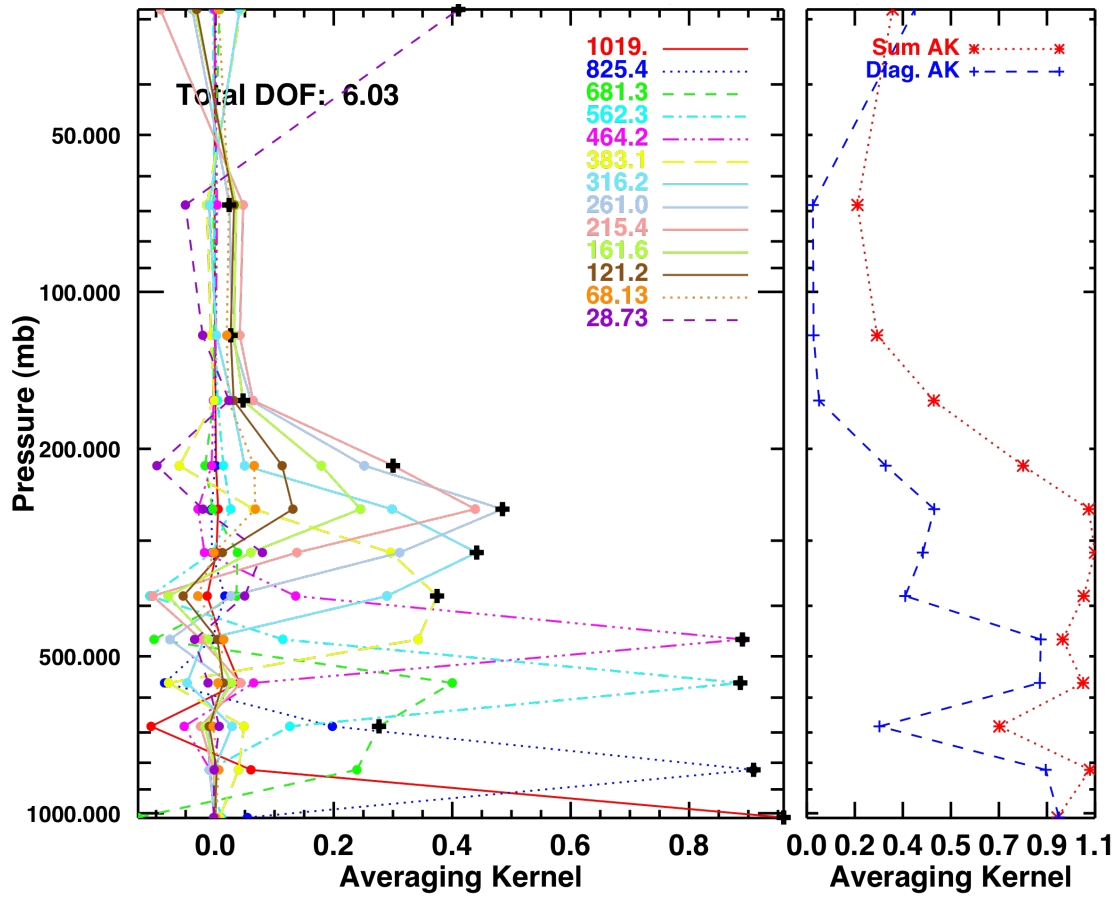

1

2

3 Supplementary Figure 2(b). Averaging kernel for the P-branch only water vapor  
 4 retrievals using LBLRTM v12.1 for an example profile with 1.5 cm PWV. The LBLRTM  
 5 v9.4+ averaging kernel (not shown) is similar.

6

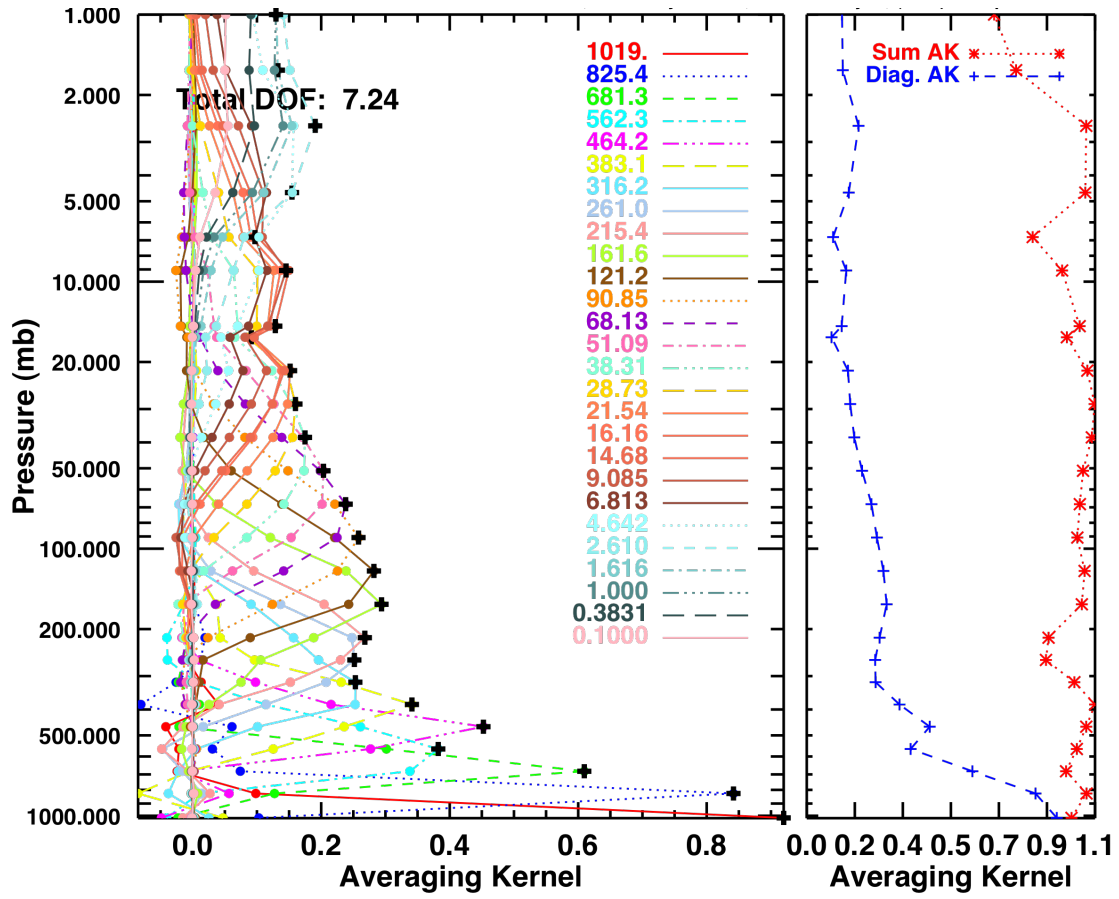

1

2

3 Supplementary Figure 3. Averaging kernel for the second, constrained CO<sub>2</sub> v<sub>2</sub> band  
 4 temperature retrieval using LBLRTM v12.1 for an example profile with 1.5 cm PWV.  
 5 The LBLRTM v9.4+ averaging kernel (not shown) is similar.

6

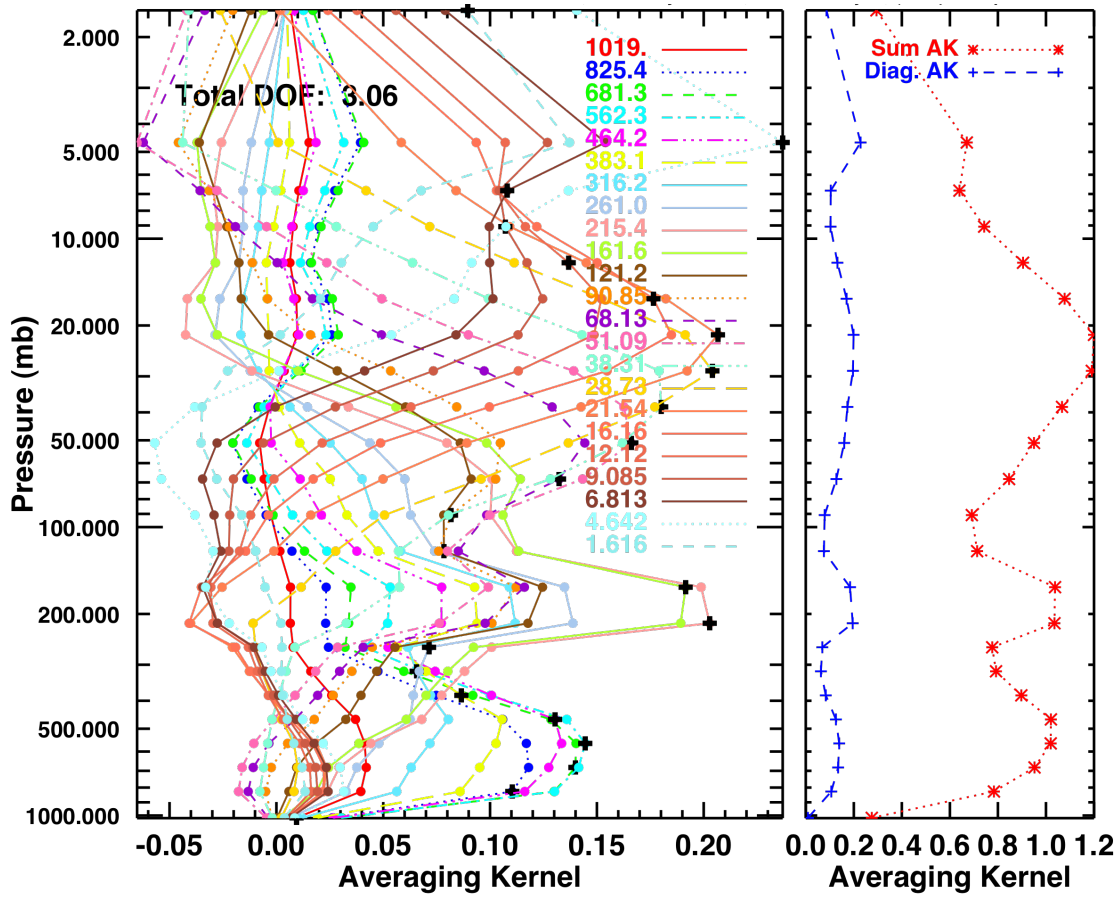

1  
2  
3  
4  
5  
6

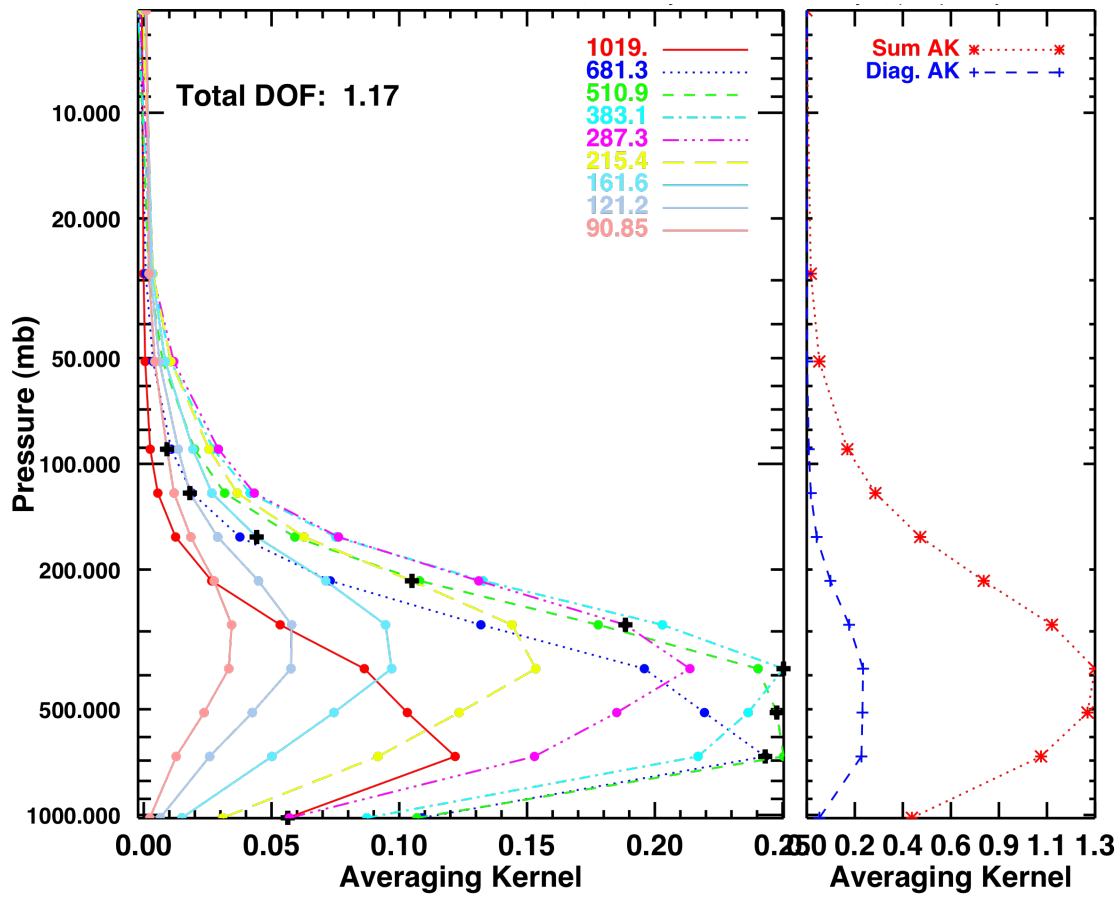

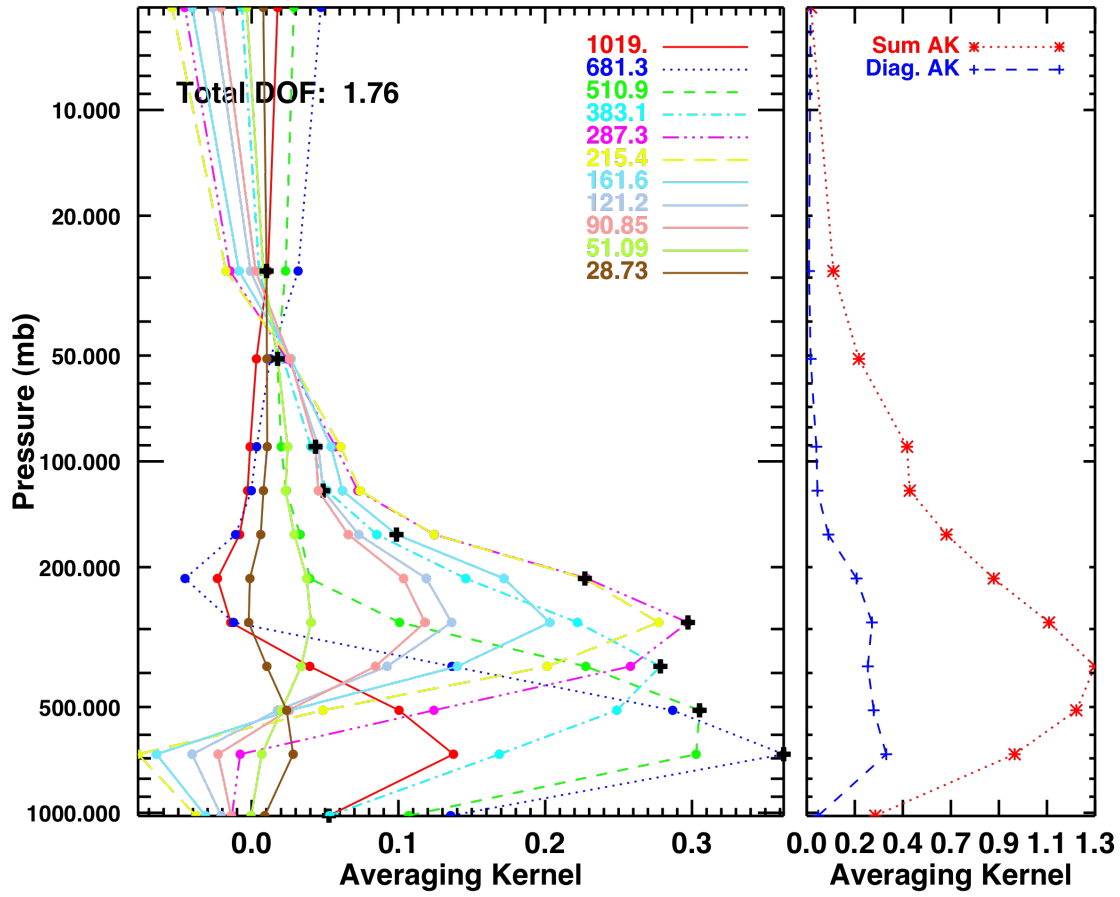

Supplementary Figure 6. Averaging kernel for the CH<sub>4</sub> retrieval using LBLRTM v12.1 for an example profile with 1.5 cm PWV. The LBLRTM v9.4+ averaging kernel (not shown) is similar.



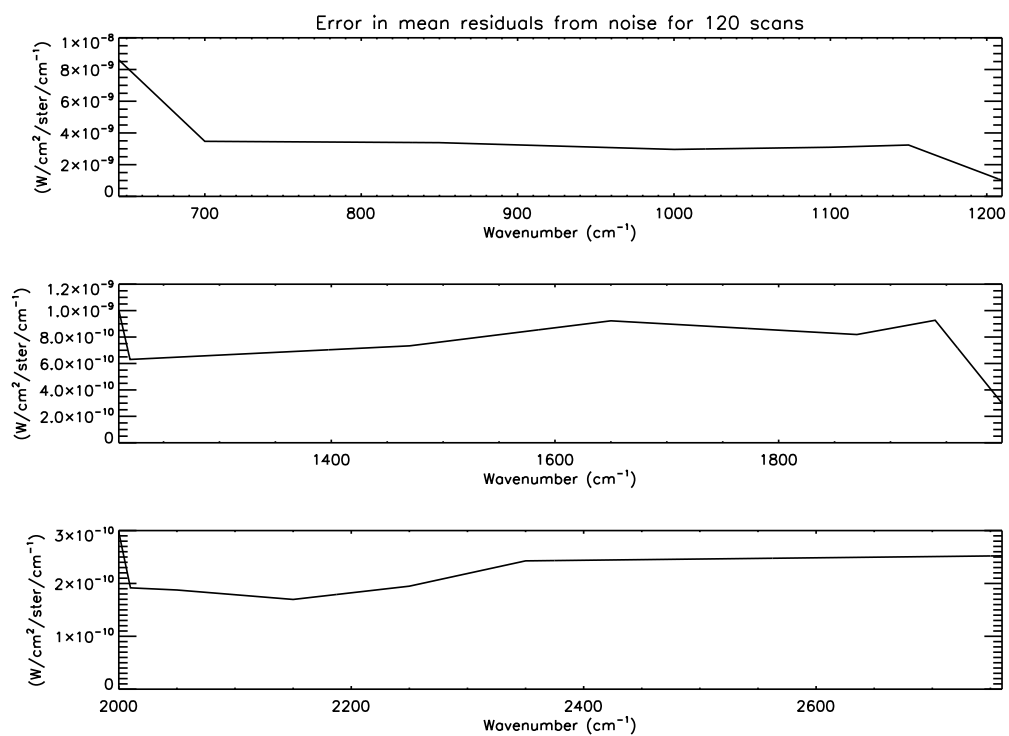

1  
2 Supplementary Figure 7: Error in mean residuals (averaged over 120 scans) from noise in  
3 radiance units.

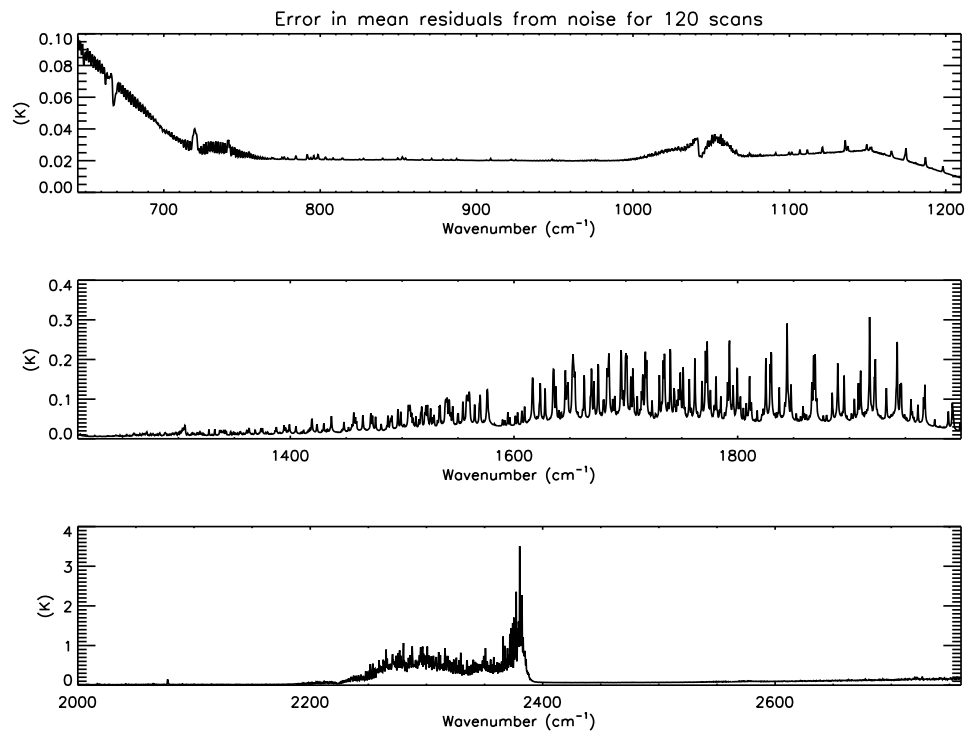

1  
2 Supplementary Figure 8: Error in mean residuals (averaged over 120 scans) from noise in  
3 brightness temperature units (calculated by adding the radiance error to the observed  
4 radiances of the moderate water vapor case).  
5
